# Supplementary material for: The Influence of Drug–Polymer Solubility on Laser-Induced In Situ Drug Amorphization Using Photothermal Plasmonic Nanoparticles
Source: MDPI journal article supplement (doi:10.3390/pharmaceutics13060917), 2021-06-21
Supplement: s1 [file s1]

# Supplementary Materials: The Influence of Drug–Polymer Solubility on Laser-Induced In Situ Drug Amorphization Using Photothermal Plasmonic Nanoparticles

Nele-Johanna Hempel, Padryk Merkl, Matthias Manne Knopp, Ragna Berthelsen, Alexandra Teleki, Georgios A. Sotiriou and Korbinian Löbmann

## S.1. Drug-Polymer Solubility

The respective graphs for each drug-polymer combination are shown in Figure 1.

**Table S1.** Solubility of CCX at 20 °C in the six different polymers given with the confidence interval.

| Polymer  | Solubility [wt%] | t <sub>2.5</sub> [wt%] | t <sub>97.5</sub> [wt%] |
|----------|------------------|------------------------|-------------------------|
| VA64     | 31.8             | 27.6                   | 35.0                    |
| Soluplus | 22.5             | 7.3                    | 34.6                    |
| HPMCAS   | 5.3              | 1.1                    | 13.6                    |
| EPO      | 3.6              | 0.6                    | 11.9                    |
| EL100    | 0                | 0                      | 0                       |
| PVA      | 0                | 0                      | 0                       |

## S.2. XRPD Analysis

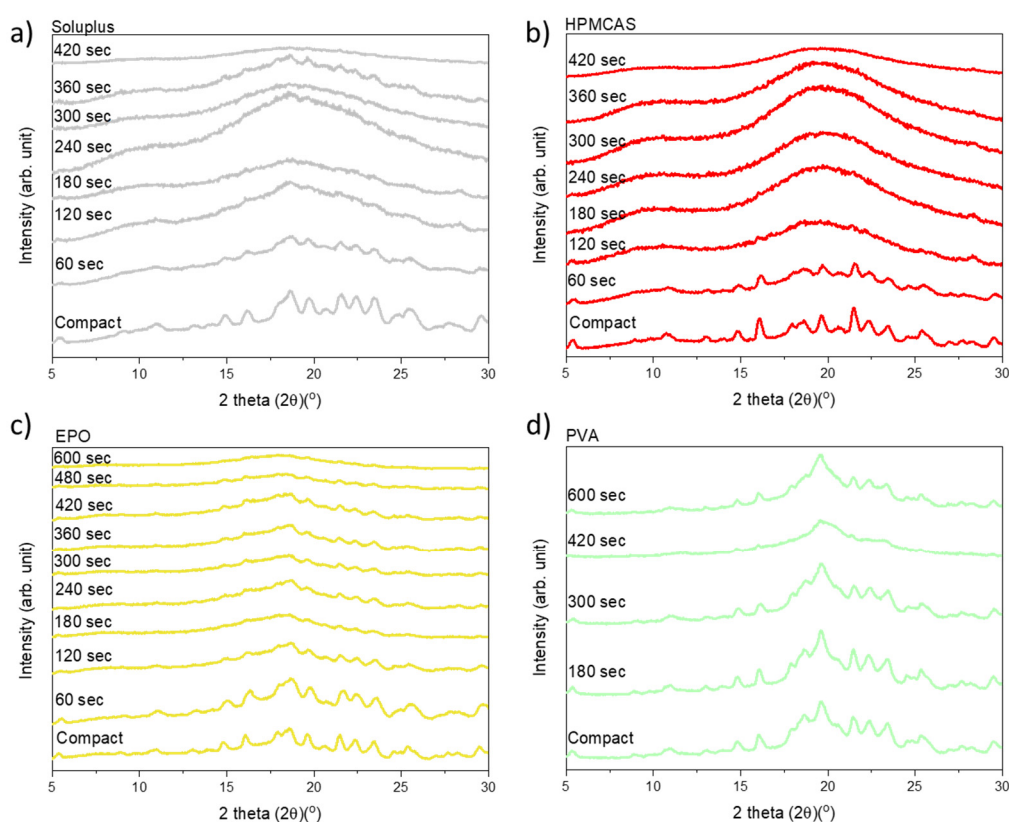

**Figure S1.** XRPD analysis after different exposure times to laser radiation [sec] and before exposure to laser radiation (compact) for the different compact compositions. **a)** 30 wt% CCX in Soluplus; **b)** 30 wt% CCX in HPMCAS; **c)** 30 wt% CCX in EPO; **d)** 30 wt% CCX in PVA. Note: Due to the scaling of the diffractograms, it is sometimes difficult to see small peaks in the figures. The remaining diffractograms are part of the main manuscript.

### S.3. Temperature Measurements

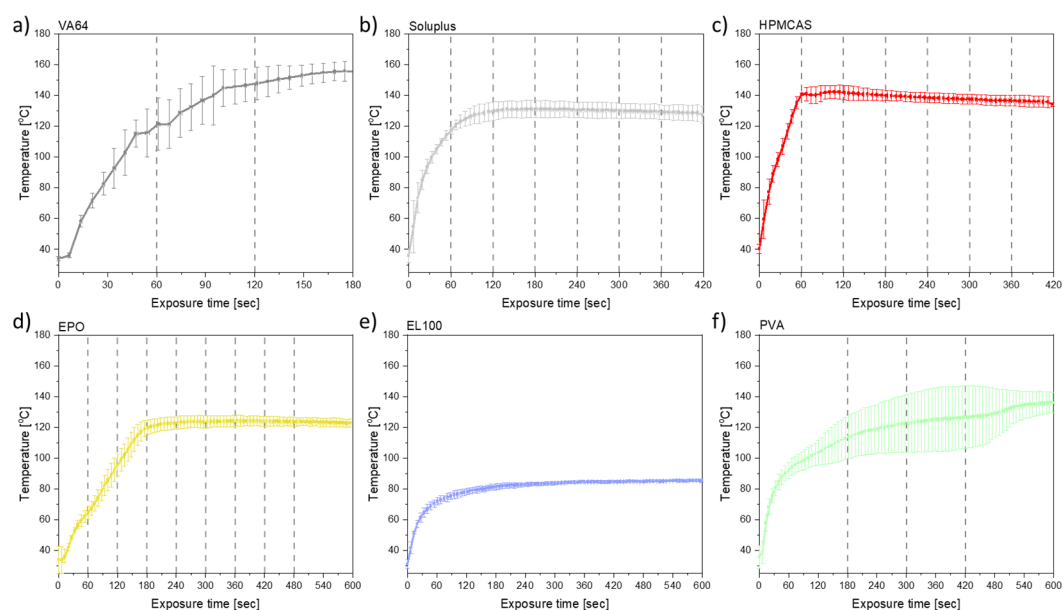

**Figure S2.** Temperature measured [°C] during exposure to laser radiation [sec] for the different compact compositions. **a)** 30 wt% CCX in VA64; **b)** 30 wt% CCX in Soluplus; **c)** 30 wt% CCX in HPMCAS; **d)** 30 wt% CCX in EPO; **e)** 30 wt% CCX in EL100; **f)** 30 wt% CCX in PVA. The dashed line indicate the different exposure times for XRPD analysis. Mean  $\pm$  SD ( $n=3$ ).
